# Supplementary material for: Direct Injection of Recombinant AAV-Containing Solution into the Oviductal Lumen of Pregnant Mice Caused In Situ Infection of Both Preimplantation Embryos and Oviductal Epithelium
Source: MDPI journal article supplement (doi:10.3390/ijms23094897), 2022-04-28
Supplement: s1 [file s1]

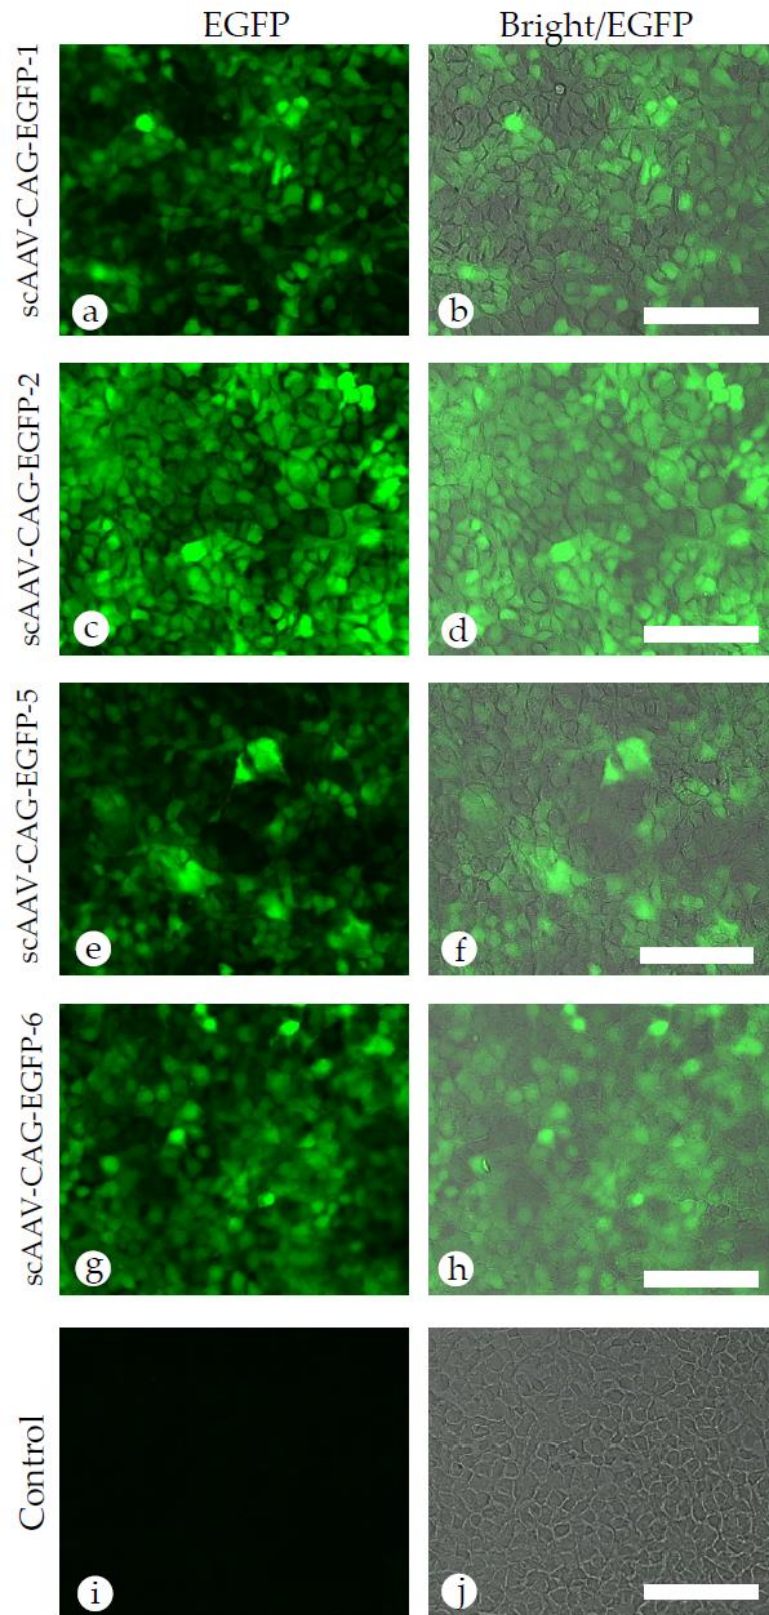

Figure S1. Transduction of EGFP-expressing rAAVs [scAAV-CAG-EGFP-1 (for a and b), -2 (for c and d), -5 (for e and f) and -6 (for g and h)] into HEK293T cells. Control, untreated HEK293T cells (for i and j). Scale bars, 100  $\mu$ m.

**A**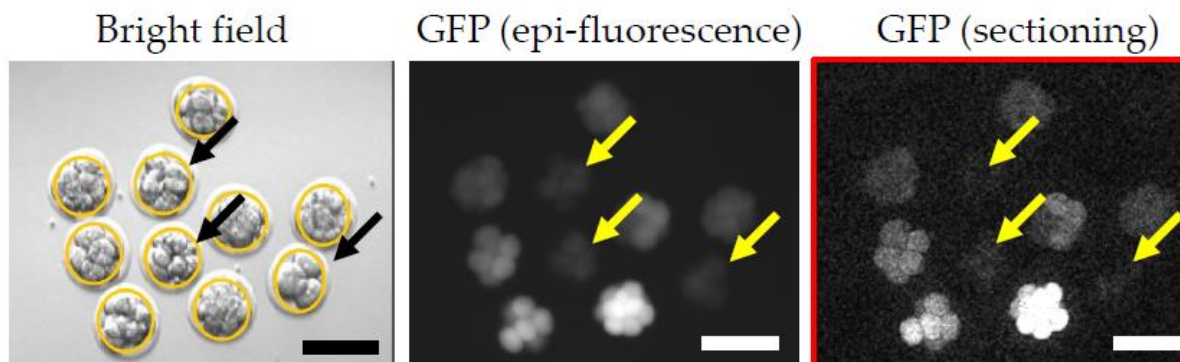**B**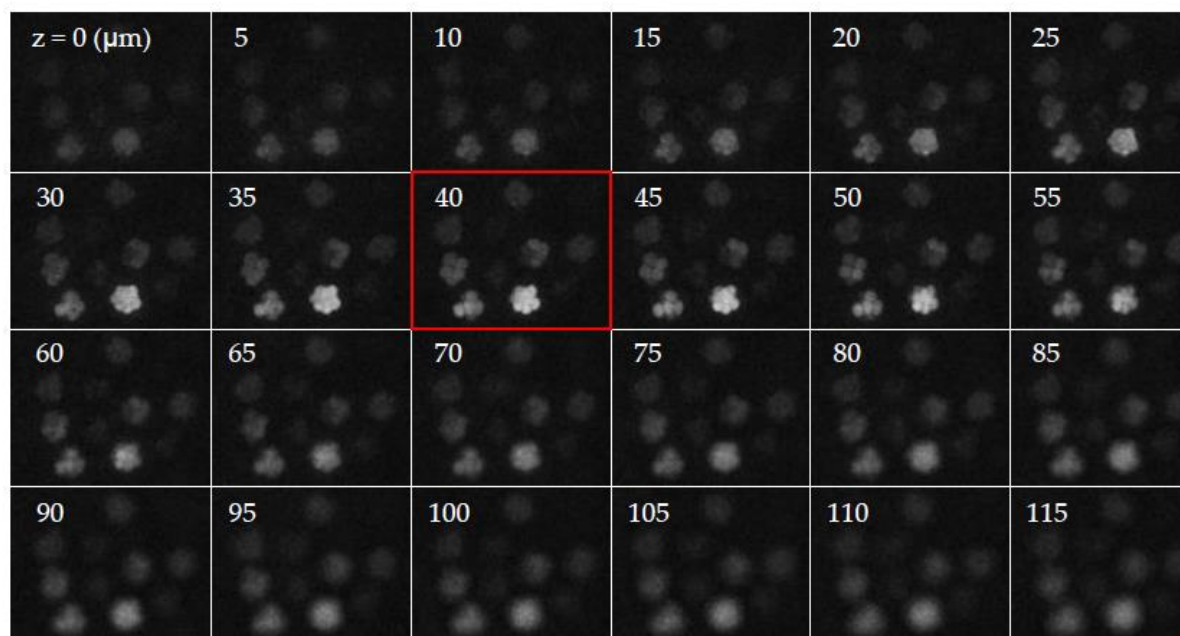**C**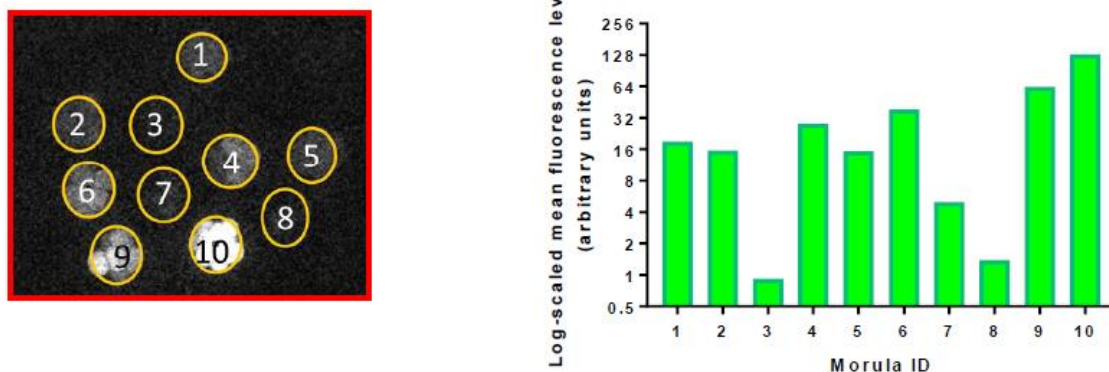

Figure S2. Quantification of GFP fluorescence in optically sectioned images. **A.** The same embryos shown in Figure 1B-a (Bright field) and -b (epi-fluorescence) were compared with an image taken with structured illumination-based optical sectioning (sectioning). Arrows indicate presumable GFP negative cells. **B.** Serial optical sectioning images of embryos with AAV-based GONAD. The sectioning image in the middle of the stack (red framed) was shown in **A** and **C** as a representative. **C.** Quantification of mean fluorescence levels for each morula in the image shown in the left. Note that morulae #3, #7 and #8 are labeled with arrows in **A**. Scale bars, 100  $\mu\text{m}$ .
